# Supplementary material for: Social and Geographical Inequalities in Suicide in Japan from 1975 through 2005: A Census-Based Longitudinal Analysis
Source: PubMed Central journal article supplement (PMC3646025; doi:10.1371/journal.pone.0063443), 2013-05-06
Supplement: pone.0063443.s001.pdf [file pone.0063443.s001.pdf]

**Table S1.** The history of the Japan Standard Occupational Classification<sup>a</sup>

| 1st revision, 1970 |                                                         | 2nd revision, 1979 |                                                         | 3rd revision, 1986 |                                                                                 | 4th revision, 1997 |                                               |
|--------------------|---------------------------------------------------------|--------------------|---------------------------------------------------------|--------------------|---------------------------------------------------------------------------------|--------------------|-----------------------------------------------|
| No.                | Occupation (major group)                                | No.                | Occupation (major group)                                | No.                | Occupation (major group)                                                        | No.                | Occupation (major group)                      |
| (1)                | [1] Professional and technical workers                  | (1)                | [1] Professional and technical workers                  | (1)                | [1] Professional and technical workers                                          | (1)                | [1] Specialist and technical workers          |
| (2)                | [2] Managers and officials                              | (2)                | [2] Managers and officials                              | (2)                | [2] Managers and officials                                                      | (2)                | [2] Administrative and managerial workers     |
| (3)                | [3] Clerical and related workers                        | (3)                | [3] Clerical and related workers                        | (3)                | [3] Clerical and related workers                                                | (3)                | [3] Clerical workers                          |
| (4)                | [4] Sales workers                                       | (4)                | [4] Sales workers                                       | (4)                | [4] Sales workers                                                               | (4)                | [4] Sales workers                             |
| (5)                | [7] Farmers, Lumbermen and fishermen                    | (5)                | [7] Agricultural, forestry and fisheries workers        | (5)                | [5] Service workers                                                             | (5)                | [5] Service workers                           |
| (6)                | [9] Workers in mining and quarrying occupations         | (6)                | [9] Mining workers                                      | (6)                | [6] Protective service workers                                                  | (6)                | [6] Security workers                          |
| (7)                | [8] Workers in transport and communications occupations | (7)                | [8] Workers in transport and communications occupations | (7)                | [7] Agricultural, forestry and fisheries workers                                | (7)                | [7] Agriculture, forestry and fishery workers |
| (8)                | [9] Craftsmen, production process workers and labourers | (8)                | [9] Craftsmen, production process workers and labours   | (8)                | [8] Workers in transport and communications occupations                         | (8)                | [8] Transport and communication workers       |
| (9)                | [6] Protective service workers                          | (9)                | [6] Protective service workers                          | (9)                | [9] Craftsmen, mining, production process and construction workers and laborers | (9)                | [9] Production process and related workers    |
| (10)               | [5] Service workers                                     | (10)               | [5] Service workers                                     | (10)               | [10] Workers not classifiable by occupation                                     | (10)               | [10] Workers not classifiable by occupation   |
| (11)               | [10] Unclassifiable                                     | (11)               | [10] Workers not classifiable by occupation             | (11)               | [11] Non-employed <sup>b</sup>                                                  | (11)               | [11] Non-employed <sup>b</sup>                |
| (12)               | [11] Non-employed <sup>b</sup>                          | (11)               | [11] Non-employed <sup>b</sup>                          |                    |                                                                                 |                    |                                               |

<sup>a</sup> We consistently used occupation (major group) of the 4th revision. The number in square brackets is the classification used in this present study.

<sup>b</sup> Non-employed includes the unemployed as well as the non-labor force in line with the *Report of Vital Statistics: Occupational and Industrial Aspects*.
