# Supplementary material for: Social and Geographical Inequalities in Suicide in Japan from 1975 through 2005: A Census-Based Longitudinal Analysis
Source: PubMed Central journal article supplement (PMC3646025; doi:10.1371/journal.pone.0063443), 2013-05-06
Supplement: pone.0063443.s002.pdf [file pone.0063443.s002.pdf]

**Table S2.** The number in each occupation and their percentage of the total population among those aged 25–64 years, Japan, 1975–2005

|                                           | 1975       |        | 1980       |        | 1985       |        | 1990       |        | 1995       |        | 2000       |        | 2005       |        |
|-------------------------------------------|------------|--------|------------|--------|------------|--------|------------|--------|------------|--------|------------|--------|------------|--------|
|                                           | N          | %      | N          | %      | N          | %      | N          | %      | N          | %      | N          | %      | N          | %      |
| <i>Men</i>                                |            |        |            |        |            |        |            |        |            |        |            |        |            |        |
| Specialist and technical workers          | 2,080,025  | 7.25   | 2,306,830  | 7.51   | 3,143,412  | 9.76   | 3,637,515  | 10.95  | 3,991,077  | 11.72  | 4,221,683  | 12.27  | 3,950,815  | 11.90  |
| Administrative and managerial workers     | 1,972,340  | 6.88   | 2,210,783  | 7.19   | 1,868,101  | 5.80   | 1,998,511  | 6.01   | 2,066,172  | 6.07   | 1,305,093  | 3.79   | 1,031,316  | 3.11   |
| Clerical workers                          | 3,674,725  | 12.81  | 3,637,048  | 11.83  | 3,857,022  | 11.98  | 3,895,784  | 11.72  | 3,906,006  | 11.47  | 4,077,310  | 11.85  | 4,093,124  | 12.33  |
| Sales workers                             | 3,508,340  | 12.23  | 4,132,015  | 13.44  | 4,509,884  | 14.00  | 4,794,455  | 14.43  | 5,044,836  | 14.82  | 5,159,661  | 15.00  | 4,716,064  | 14.21  |
| Service workers                           | 984,940    | 3.43   | 1,027,910  | 3.34   | 1,123,385  | 3.49   | 1,202,319  | 3.62   | 1,270,668  | 3.73   | 1,381,504  | 4.02   | 1,441,522  | 4.34   |
| Security workers                          | 520,720    | 1.82   | 567,438    | 1.85   | 615,053    | 1.91   | 660,161    | 1.99   | 706,462    | 2.08   | 787,325    | 2.29   | 832,148    | 2.51   |
| Agriculture, forestry and fishery workers | 2,849,180  | 9.94   | 2,379,666  | 7.74   | 2,112,513  | 6.56   | 1,615,756  | 4.86   | 1,199,620  | 3.52   | 899,881    | 2.62   | 823,066    | 2.48   |
| Transport and communication workers       | 1,972,390  | 6.88   | 2,072,133  | 6.74   | 1,997,137  | 6.20   | 1,984,890  | 5.97   | 2,020,393  | 5.93   | 1,957,847  | 5.69   | 1,794,551  | 5.41   |
| Production process and related workers    | 9,645,620  | 33.63  | 10,682,007 | 34.76  | 10,644,436 | 33.05  | 10,985,461 | 33.06  | 10,945,330 | 32.15  | 10,762,241 | 31.28  | 10,451,026 | 31.48  |
| Workers not classifiable by occupation    | 13,870     | 0.05   | 22,474     | 0.07   | 50,391     | 0.16   | 115,015    | 0.35   | 151,362    | 0.44   | 294,663    | 0.86   | 502,667    | 1.51   |
| Non-employed <sup>a</sup>                 | 1,456,032  | 5.08   | 1,696,114  | 5.52   | 2,283,403  | 7.09   | 2,339,703  | 7.04   | 2,744,327  | 8.06   | 3,559,611  | 10.35  | 3,559,611  | 10.72  |
| Total                                     | 28,678,182 | 100.00 | 30,734,418 | 100.00 | 32,204,737 | 100.00 | 33,229,570 | 100.00 | 34,046,253 | 100.00 | 34,406,819 | 100.00 | 33,195,910 | 100.00 |
| <i>Women</i>                              |            |        |            |        |            |        |            |        |            |        |            |        |            |        |
| Specialist and technical workers          | 1,121,045  | 3.73   | 1,507,610  | 4.72   | 1,891,400  | 5.73   | 2,250,231  | 6.69   | 2,684,971  | 7.83   | 3,094,599  | 8.87   | 3,459,894  | 9.83   |
| Administrative and managerial workers     | 105,985    | 0.35   | 155,251    | 0.49   | 171,782    | 0.52   | 184,219    | 0.55   | 199,894    | 0.58   | 142,983    | 0.41   | 123,283    | 0.35   |
| Clerical workers                          | 2,753,760  | 9.16   | 3,369,822  | 10.56  | 4,248,922  | 12.86  | 5,155,485  | 15.32  | 5,748,954  | 16.76  | 6,289,031  | 18.03  | 6,422,961  | 18.25  |
| Sales workers                             | 2,152,320  | 7.16   | 2,586,857  | 8.11   | 2,447,212  | 7.41   | 2,534,197  | 7.53   | 2,702,863  | 7.88   | 2,618,387  | 7.51   | 2,561,132  | 7.28   |
| Service workers                           | 1,974,925  | 6.57   | 2,106,305  | 6.60   | 2,173,931  | 6.58   | 2,263,285  | 6.73   | 2,516,848  | 7.34   | 2,825,178  | 8.10   | 3,207,147  | 9.11   |
| Security workers                          | 8,010      | 0.03   | 9,876      | 0.03   | 12,390     | 0.04   | 16,562     | 0.05   | 24,289     | 0.07   | 37,414     | 0.11   | 43,158     | 0.12   |
| Agriculture, forestry and fishery workers | 3,154,040  | 10.49  | 2,471,427  | 7.75   | 2,029,368  | 6.14   | 1,478,304  | 4.39   | 1,055,672  | 3.08   | 755,524    | 2.17   | 600,419    | 1.71   |
| Transport and communication workers       | 108,500    | 0.36   | 108,205    | 0.34   | 96,205     | 0.29   | 84,717     | 0.25   | 93,936     | 0.27   | 92,226     | 0.26   | 85,394     | 0.24   |
| Production process and related workers    | 3,691,205  | 12.28  | 4,456,927  | 13.97  | 4,911,261  | 14.87  | 5,158,278  | 15.33  | 4,862,147  | 14.17  | 4,664,292  | 13.37  | 4,228,532  | 12.01  |
| Workers not classifiable by occupation    | 34,995     | 0.12   | 24,186     | 0.08   | 66,917     | 0.20   | 89,544     | 0.27   | 121,135    | 0.35   | 223,913    | 0.64   | 327,266    | 0.93   |
| Non-employed <sup>a</sup>                 | 14,949,973 | 49.74  | 15,110,843 | 47.36  | 14,978,370 | 45.35  | 14,434,745 | 42.90  | 14,296,062 | 41.67  | 14,141,088 | 40.54  | 14,141,088 | 40.17  |
| Total                                     | 30,054,758 | 100.00 | 31,907,309 | 100.00 | 33,027,758 | 100.00 | 33,649,567 | 100.00 | 34,306,771 | 100.00 | 34,884,635 | 100.00 | 35,200,274 | 100.00 |

<sup>a</sup> Non-employed includes the unemployed as well as the non-labor force.
