# Supplementary material for: Social and Geographical Inequalities in Suicide in Japan from 1975 through 2005: A Census-Based Longitudinal Analysis
Source: PubMed Central journal article supplement (PMC3646025; doi:10.1371/journal.pone.0063443), 2013-05-06
Supplement: pone.0063443.s003.pdf [file pone.0063443.s003.pdf]

**Table S3.** Description of data used for multilevel models analyzing suicide mortality in 47 prefectures, Japan, 1975–2005

| Characteristics                           | Men                       |                       |                  |                                       |         | Women                     |                       |                  |                                       |         |
|-------------------------------------------|---------------------------|-----------------------|------------------|---------------------------------------|---------|---------------------------|-----------------------|------------------|---------------------------------------|---------|
|                                           | No. of cells <sup>a</sup> | No. of suicide deaths | Total population | Suicide rate per 100,000 <sup>b</sup> | (SD)    | No. of cells <sup>a</sup> | No. of suicide deaths | Total population | Suicide rate per 100,000 <sup>b</sup> | (SD)    |
| Overall                                   | 28,876                    | 75,840                | 226,497,092      | 209                                   | (1,742) | 28,843                    | 30,487                | 233,031,209      | 55                                    | (660)   |
| <i>Level 1: cell</i>                      |                           |                       |                  |                                       |         |                           |                       |                  |                                       |         |
| Specialist and technical workers          |                           |                       |                  |                                       |         |                           |                       |                  |                                       |         |
| 25-29 y                                   | 329                       | 530                   | 3,888,159        | 17                                    | (21)    | 329                       | 195                   | 3,572,393        | 6                                     | (10)    |
| 30-34 y                                   | 329                       | 542                   | 4,066,756        | 15                                    | (19)    | 329                       | 156                   | 2,659,697        | 6                                     | (13)    |
| 35-39 y                                   | 329                       | 591                   | 3,762,304        | 17                                    | (20)    | 329                       | 142                   | 2,417,547        | 6                                     | (14)    |
| 40-44 y                                   | 329                       | 620                   | 3,357,225        | 22                                    | (23)    | 329                       | 150                   | 2,305,628        | 7                                     | (14)    |
| 45-49 y                                   | 329                       | 769                   | 2,902,665        | 29                                    | (28)    | 329                       | 122                   | 2,033,537        | 6                                     | (14)    |
| 50-54 y                                   | 329                       | 809                   | 2,391,228        | 33                                    | (38)    | 329                       | 126                   | 1,567,904        | 9                                     | (18)    |
| 55-59 y                                   | 329                       | 755                   | 1,877,231        | 39                                    | (48)    | 329                       | 99                    | 1,004,569        | 11                                    | (31)    |
| 60-64 y                                   | 329                       | 396                   | 1,085,789        | 37                                    | (54)    | 329                       | 59                    | 448,475          | 16                                    | (52)    |
| Administrative and managerial workers     |                           |                       |                  |                                       |         |                           |                       |                  |                                       |         |
| 25-29 y                                   | 329                       | 48                    | 218,875          | 29                                    | (127)   | 328                       | 6                     | 22,719           | 16                                    | (157)   |
| 30-34 y                                   | 329                       | 81                    | 622,793          | 20                                    | (74)    | 329                       | 15                    | 50,667           | 46                                    | (305)   |
| 35-39 y                                   | 329                       | 135                   | 1,187,754        | 14                                    | (36)    | 329                       | 23                    | 92,555           | 19                                    | (92)    |
| 40-44 y                                   | 329                       | 289                   | 1,824,130        | 22                                    | (34)    | 329                       | 23                    | 141,961          | 10                                    | (48)    |
| 45-49 y                                   | 329                       | 448                   | 2,297,120        | 24                                    | (35)    | 329                       | 37                    | 188,011          | 17                                    | (79)    |
| 50-54 y                                   | 329                       | 580                   | 2,512,706        | 28                                    | (34)    | 329                       | 68                    | 213,688          | 20                                    | (70)    |
| 55-59 y                                   | 329                       | 573                   | 2,285,689        | 28                                    | (34)    | 329                       | 40                    | 207,309          | 20                                    | (76)    |
| 60-64 y                                   | 329                       | 291                   | 1,503,249        | 21                                    | (32)    | 329                       | 33                    | 166,487          | 21                                    | (98)    |
| Clerical workers                          |                           |                       |                  |                                       |         |                           |                       |                  |                                       |         |
| 25-29 y                                   | 329                       | 671                   | 3,960,737        | 18                                    | (18)    | 329                       | 352                   | 6,860,889        | 6                                     | (9)     |
| 30-34 y                                   | 329                       | 648                   | 4,173,085        | 18                                    | (18)    | 329                       | 208                   | 5,135,278        | 4                                     | (7)     |
| 35-39 y                                   | 329                       | 675                   | 4,085,799        | 17                                    | (16)    | 329                       | 191                   | 4,982,773        | 4                                     | (9)     |
| 40-44 y                                   | 329                       | 751                   | 3,933,676        | 21                                    | (20)    | 329                       | 193                   | 5,121,861        | 4                                     | (9)     |
| 45-49 y                                   | 329                       | 837                   | 3,700,663        | 24                                    | (23)    | 329                       | 214                   | 4,660,897        | 5                                     | (9)     |
| 50-54 y                                   | 329                       | 792                   | 3,302,327        | 24                                    | (22)    | 329                       | 171                   | 3,677,102        | 5                                     | (9)     |
| 55-59 y                                   | 329                       | 512                   | 2,619,470        | 20                                    | (23)    | 329                       | 122                   | 2,423,883        | 6                                     | (19)    |
| 60-64 y                                   | 329                       | 170                   | 1,365,262        | 13                                    | (27)    | 329                       | 36                    | 1,126,252        | 4                                     | (15)    |
| Sales workers                             |                           |                       |                  |                                       |         |                           |                       |                  |                                       |         |
| 25-29 y                                   | 329                       | 562                   | 5,235,044        | 13                                    | (15)    | 329                       | 143                   | 2,073,531        | 8                                     | (16)    |
| 30-34 y                                   | 329                       | 599                   | 5,383,356        | 13                                    | (15)    | 329                       | 139                   | 1,971,428        | 6                                     | (14)    |
| 35-39 y                                   | 329                       | 692                   | 5,003,992        | 18                                    | (18)    | 329                       | 124                   | 2,294,947        | 5                                     | (12)    |
| 40-44 y                                   | 329                       | 794                   | 4,520,363        | 22                                    | (22)    | 329                       | 156                   | 2,646,474        | 6                                     | (10)    |
| 45-49 y                                   | 329                       | 1,005                 | 3,970,321        | 32                                    | (30)    | 329                       | 185                   | 2,759,364        | 7                                     | (12)    |
| 50-54 y                                   | 329                       | 988                   | 3,367,461        | 37                                    | (32)    | 329                       | 210                   | 2,533,410        | 9                                     | (15)    |
| 55-59 y                                   | 329                       | 848                   | 2,685,924        | 37                                    | (36)    | 329                       | 156                   | 2,010,056        | 9                                     | (16)    |
| 60-64 y                                   | 329                       | 511                   | 1,698,794        | 34                                    | (38)    | 329                       | 115                   | 1,313,758        | 9                                     | (20)    |
| Service workers                           |                           |                       |                  |                                       |         |                           |                       |                  |                                       |         |
| 25-29 y                                   | 329                       | 375                   | 1,485,277        | 29                                    | (35)    | 329                       | 202                   | 1,689,226        | 14                                    | (24)    |
| 30-34 y                                   | 329                       | 358                   | 1,312,656        | 29                                    | (40)    | 329                       | 175                   | 1,733,370        | 9                                     | (16)    |
| 35-39 y                                   | 329                       | 383                   | 1,176,337        | 39                                    | (50)    | 329                       | 155                   | 2,116,096        | 8                                     | (14)    |
| 40-44 y                                   | 329                       | 461                   | 1,078,948        | 48                                    | (55)    | 329                       | 176                   | 2,509,611        | 7                                     | (13)    |
| 45-49 y                                   | 329                       | 561                   | 983,175          | 65                                    | (75)    | 329                       | 201                   | 2,704,363        | 9                                     | (14)    |
| 50-54 y                                   | 329                       | 595                   | 894,930          | 64                                    | (77)    | 329                       | 209                   | 2,677,366        | 8                                     | (13)    |
| 55-59 y                                   | 329                       | 558                   | 820,949          | 64                                    | (76)    | 329                       | 193                   | 2,277,148        | 9                                     | (17)    |
| 60-64 y                                   | 329                       | 300                   | 679,976          | 42                                    | (73)    | 329                       | 119                   | 1,360,439        | 9                                     | (22)    |
| Security workers                          |                           |                       |                  |                                       |         |                           |                       |                  |                                       |         |
| 25-29 y                                   | 329                       | 118                   | 749,368          | 15                                    | (37)    | 326                       | 7                     | 38,006           | 23                                    | (263)   |
| 30-34 y                                   | 329                       | 111                   | 683,447          | 18                                    | (44)    | 320                       | 7                     | 23,235           | 17                                    | (158)   |
| 35-39 y                                   | 329                       | 113                   | 629,215          | 17                                    | (38)    | 321                       | 7                     | 17,446           | 181                                   | (2,806) |
| 40-44 y                                   | 329                       | 122                   | 615,612          | 16                                    | (32)    | 323                       | 9                     | 17,797           | 110                                   | (853)   |
| 45-49 y                                   | 329                       | 181                   | 621,942          | 32                                    | (67)    | 326                       | 5                     | 17,799           | 27                                    | (283)   |
| 50-54 y                                   | 329                       | 158                   | 575,320          | 27                                    | (55)    | 321                       | 8                     | 17,028           | 36                                    | (363)   |
| 55-59 y                                   | 329                       | 132                   | 484,783          | 26                                    | (58)    | 313                       | 9                     | 13,567           | 41                                    | (344)   |
| 60-64 y                                   | 329                       | 67                    | 329,620          | 20                                    | (74)    | 300                       | 4                     | 6,821            | 159                                   | (1,674) |
| Agriculture, forestry and fishery workers |                           |                       |                  |                                       |         |                           |                       |                  |                                       |         |
| 25-29 y                                   | 329                       | 293                   | 683,466          | 46                                    | (80)    | 329                       | 75                    | 442,656          | 13                                    | (56)    |
| 30-34 y                                   | 329                       | 377                   | 805,280          | 52                                    | (75)    | 329                       | 82                    | 711,465          | 13                                    | (53)    |
| 35-39 y                                   | 329                       | 425                   | 999,264          | 46                                    | (54)    | 329                       | 127                   | 1,018,905        | 8                                     | (18)    |
| 40-44 y                                   | 329                       | 627                   | 1,307,945        | 53                                    | (58)    | 329                       | 206                   | 1,367,176        | 13                                    | (24)    |
| 45-49 y                                   | 329                       | 802                   | 1,648,817        | 59                                    | (55)    | 329                       | 303                   | 1,746,779        | 18                                    | (37)    |
| 50-54 y                                   | 329                       | 919                   | 1,878,069        | 54                                    | (47)    | 329                       | 390                   | 2,028,779        | 18                                    | (24)    |
| 55-59 y                                   | 329                       | 1,011                 | 2,108,375        | 50                                    | (38)    | 329                       | 396                   | 2,149,926        | 19                                    | (25)    |
| 60-64 y                                   | 329                       | 999                   | 2,448,466        | 42                                    | (33)    | 329                       | 393                   | 2,079,068        | 18                                    | (22)    |
| Transport and communication workers       |                           |                       |                  |                                       |         |                           |                       |                  |                                       |         |
| 25-29 y                                   | 329                       | 303                   | 1,690,514        | 19                                    | (33)    | 329                       | 21                    | 124,283          | 19                                    | (130)   |
| 30-34 y                                   | 329                       | 387                   | 1,985,796        | 19                                    | (25)    | 329                       | 21                    | 104,743          | 17                                    | (88)    |
| 35-39 y                                   | 329                       | 440                   | 2,077,538        | 23                                    | (29)    | 329                       | 25                    | 104,714          | 17                                    | (73)    |
| 40-44 y                                   | 329                       | 597                   | 2,101,562        | 30                                    | (32)    | 329                       | 21                    | 109,123          | 13                                    | (69)    |
| 45-49 y                                   | 329                       | 616                   | 2,037,400        | 32                                    | (32)    | 329                       | 24                    | 99,525           | 23                                    | (114)   |
| 50-54 y                                   | 329                       | 605                   | 1,841,475        | 32                                    | (33)    | 329                       | 27                    | 72,778           | 28                                    | (134)   |
| 55-59 y                                   | 329                       | 517                   | 1,413,495        | 32                                    | (39)    | 328                       | 18                    | 40,547           | 27                                    | (164)   |
| 60-64 y                                   | 329                       | 168                   | 651,561          | 23                                    | (59)    | 318                       | 5                     | 13,470           | 39                                    | (433)   |
| Production process and related workers    |                           |                       |                  |                                       |         |                           |                       |                  |                                       |         |
| 25-29 y                                   | 329                       | 1,361                 | 10,692,627       | 13                                    | (10)    | 329                       | 129                   | 2,309,022        | 5                                     | (10)    |
| 30-34 y                                   | 329                       | 1,460                 | 10,755,951       | 15                                    | (11)    | 329                       | 136                   | 3,067,564        | 4                                     | (8)     |
| 35-39 y                                   | 329                       | 1,560                 | 10,396,964       | 17                                    | (11)    | 329                       | 161                   | 4,295,460        | 4                                     | (7)     |
| 40-44 y                                   | 329                       | 1,827                 | 10,265,445       | 20                                    | (14)    | 329                       | 197                   | 5,281,703        | 4                                     | (7)     |
| 45-49 y                                   | 329                       | 2,144                 | 10,010,317       | 24                                    | (14)    | 329                       | 230                   | 5,528,330        | 4                                     | (6)     |
| 50-54 y                                   | 329                       | 2,156                 | 9,332,509        | 26                                    | (15)    | 329                       | 272                   | 5,112,741        | 6                                     | (8)     |
| 55-59 y                                   | 329                       | 1,692                 | 7,897,054        | 24                                    | (17)    | 329                       | 191                   | 4,033,500        | 5                                     | (8)     |
| 60-64 y                                   | 329                       | 829                   | 4,765,254        | 18                                    | (17)    | 329                       | 108                   | 2,344,322        | 5                                     | (10)    |
| Workers not classifiable by occupation    |                           |                       |                  |                                       |         |                           |                       |                  |                                       |         |
| 25-29 y                                   | 323                       | 516                   | 205,041          | 1,673                                 | (5,428) | 328                       | 182                   | 149,785          | 447                                   | (1,870) |
| 30-34 y                                   | 323                       | 499                   | 179,894          | 1,282                                 | (4,405) | 329                       | 176                   | 121,600          | 260                                   | (907)   |
| 35-39 y                                   | 314                       | 504                   | 149,833          | 1,973                                 | (5,568) | 329                       | 131                   | 110,990          | 255                                   | (913)   |
| 40-44 y                                   | 320                       | 577                   | 135,486          | 2,528                                 | (8,216) | 328                       | 139                   | 115,968          | 282                                   | (858)   |
| 45-49 y                                   | 322                       | 779                   | 128,236          | 2,173                                 | (5,481) | 327                       | 181                   | 116,471          | 348                                   | (1,413) |
| 50-54 y                                   | 315                       | 905                   | 131,629          | 2,434                                 | (6,610) | 327                       | 231                   | 111,303          | 413                                   | (1,336) |
| 55-59 y                                   | 318                       | 759                   | 125,616          | 1,881                                 | (4,016) | 325                       | 186                   | 96,021           | 504                                   | (1,882) |
| 60-64 y                                   | 321                       | 489                   | 95,910           | 1,428                                 | (3,246) | 325                       | 143                   | 65,955           | 848                                   | (3,471) |
| Non-employed                              |                           |                       |                  |                                       |         |                           |                       |                  |                                       |         |
| 25-29 y                                   | 329                       | 2,584                 | 2,226,616        | 136                                   | (79)    | 329                       | 2,063                 | 13,781,587       | 16                                    | (10)    |
| 30-34 y                                   | 329                       | 2,450                 | 1,473,332        | 177                                   | (94)    | 329                       | 2,254                 | 15,746,209       | 16                                    | (9)     |
| 35-39 y                                   | 329                       | 2,427                 | 1,250,641        | 196                                   | (116)   | 329                       | 2,051                 | 13,237,613       | 17                                    | (10)    |
| 40-44 y                                   | 329                       | 2,716                 | 1,222,792        | 222                                   | (106)   | 329                       | 2,138                 | 10,812,226       | 23                                    | (14)    |
| 45-49 y                                   | 329                       | 3,192                 | 1,382,608        | 224                                   | (108)   | 329                       | 2,379                 | 10,360,614       | 27                                    | (15)    |
| 50-54 y                                   | 329                       | 3,699                 | 1,610,040        | 206                                   | (104)   | 329                       | 2,855                 | 11,319,968       | 28                                    | (14)    |
| 55-59 y                                   | 329                       | 4,273                 | 2,358,010        | 164                                   | (98)    | 329                       | 3,031                 | 12,346,148       | 26                                    | (12)    |
| 60-64 y                                   | 329                       | 4,251                 | 6,114,762        | 69                                    | (33)    | 329                       | 3,294                 | 14,447,804       | 24                                    | (10)    |

SD; standard deviation

<sup>a</sup> These cells are cross-classified by sex, age (five year categories), and 11 occupations.

<sup>b</sup> Suicide rate was calculated on the basis of the means of the proportion of suicide for each cell type across all prefectures.
