# Supplementary material for: Social and Geographical Inequalities in Suicide in Japan from 1975 through 2005: A Census-Based Longitudinal Analysis
Source: PubMed Central journal article supplement (PMC3646025; doi:10.1371/journal.pone.0063443), 2013-05-06
Supplement: pone.0063443.s004.pdf [file pone.0063443.s004.pdf]

**Table S4.** Time trends in age-adjusted suicide rates per 100,000 in each occupation across eight regions, Japan, 1975–2005<sup>a</sup>

|                                                                                                      | Men     |           |           |           | Women   |           |           |           |
|------------------------------------------------------------------------------------------------------|---------|-----------|-----------|-----------|---------|-----------|-----------|-----------|
|                                                                                                      | Overall | 1975–1985 | 1990–1995 | 2000–2005 | Overall | 1975–1985 | 1990–1995 | 2000–2005 |
| <i>Hokkaido region (Hokkaido)</i>                                                                    |         |           |           |           |         |           |           |           |
| Specialist and technical workers                                                                     | 25      | 16        | 16        | 43        | 8       | 16        | 4         | 6         |
| Administrative and managerial workers                                                                | 23      | 17        | 18        | 67        | 19      | 18        | 32        | 4         |
| Clerical workers                                                                                     | 24      | 24        | 19        | 28        | 5       | 8         | 1         | 5         |
| Sales workers                                                                                        | 30      | 40        | 22        | 28        | 6       | 9         | 3         | 6         |
| Service workers                                                                                      | 56      | 43        | 38        | 84        | 9       | 9         | 5         | 11        |
| Security workers                                                                                     | 25      | 15        | 25        | 35        | 53      | 159       | 0         | 48        |
| Agriculture, forestry and fishery workers                                                            | 39      | 37        | 39        | 49        | 14      | 16        | 15        | 4         |
| Transport and communication workers                                                                  | 28      | 24        | 22        | 39        | 37      | 27        | 63        | 24        |
| Production process and related workers                                                               | 20      | 22        | 15        | 22        | 4       | 5         | 4         | 2         |
| Workers not classifiable by occupation                                                               | 365     | 2,114     | 625       | 210       | 163     | 683       | 261       | 90        |
| Non-employed <sup>b</sup>                                                                            | 184     | 191       | 134       | 219       | 18      | 19        | 15        | 21        |
| <i>Tohoku region (Aomori, Iwate, Miyagi, Akita, Yamagata, and Fukushima)</i>                         |         |           |           |           |         |           |           |           |
| Specialist and technical workers                                                                     | 31      | 18        | 16        | 58        | 9       | 9         | 7         | 9         |
| Administrative and managerial workers                                                                | 25      | 16        | 23        | 60        | 13      | 12        | 20        | 0         |
| Clerical workers                                                                                     | 20      | 21        | 18        | 22        | 4       | 6         | 3         | 4         |
| Sales workers                                                                                        | 29      | 33        | 21        | 30        | 9       | 10        | 8         | 7         |
| Service workers                                                                                      | 63      | 38        | 48        | 98        | 12      | 16        | 9         | 9         |
| Security workers                                                                                     | 26      | 10        | 13        | 49        | 25      | 148       | 0         | 0         |
| Agriculture, forestry and fishery workers                                                            | 45      | 40        | 43        | 83        | 15      | 15        | 15        | 9         |
| Transport and communication workers                                                                  | 29      | 21        | 23        | 47        | 9       | 12        | 7         | 8         |
| Production process and related workers                                                               | 24      | 23        | 21        | 29        | 5       | 6         | 5         | 3         |
| Workers not classifiable by occupation                                                               | 691     | 1,907     | 952       | 491       | 212     | 360       | 414       | 124       |
| Non-employed <sup>b</sup>                                                                            | 196     | 166       | 176       | 243       | 23      | 22        | 22        | 26        |
| <i>Kanto region (Ibaraki, Tochigi, Gunma, Saitama, Chiba, Tokyo, and Kanagawa)</i>                   |         |           |           |           |         |           |           |           |
| Specialist and technical workers                                                                     | 19      | 16        | 13        | 27        | 8       | 9         | 8         | 7         |
| Administrative and managerial workers                                                                | 18      | 14        | 13        | 40        | 27      | 19        | 31        | 33        |
| Clerical workers                                                                                     | 16      | 18        | 15        | 15        | 4       | 5         | 5         | 3         |
| Sales workers                                                                                        | 15      | 21        | 11        | 15        | 6       | 8         | 5         | 5         |
| Service workers                                                                                      | 37      | 29        | 32        | 48        | 8       | 9         | 8         | 8         |
| Security workers                                                                                     | 19      | 16        | 15        | 26        | 35      | 39        | 30        | 35        |
| Agriculture, forestry and fishery workers                                                            | 42      | 40        | 42        | 57        | 17      | 19        | 12        | 8         |
| Transport and communication workers                                                                  | 24      | 25        | 20        | 29        | 36      | 50        | 20        | 40        |
| Production process and related workers                                                               | 15      | 17        | 12        | 13        | 5       | 7         | 4         | 3         |
| Workers not classifiable by occupation                                                               | 335     | 1,022     | 387       | 245       | 123     | 224       | 155       | 90        |
| Non-employed <sup>b</sup>                                                                            | 189     | 190       | 171       | 200       | 18      | 18        | 17        | 20        |
| <i>Chubu region (Niigata, Toyama, Ishikawa, Fukui, Yamanashi, Nagano, Gifu, Shizuoka, and Aichi)</i> |         |           |           |           |         |           |           |           |
| Specialist and technical workers                                                                     | 26      | 19        | 15        | 41        | 8       | 10        | 6         | 7         |
| Administrative and managerial workers                                                                | 21      | 18        | 13        | 43        | 22      | 17        | 23        | 32        |
| Clerical workers                                                                                     | 17      | 17        | 15        | 19        | 4       | 6         | 4         | 3         |
| Sales workers                                                                                        | 21      | 25        | 14        | 22        | 7       | 8         | 7         | 5         |
| Service workers                                                                                      | 49      | 28        | 41        | 78        | 8       | 10        | 7         | 8         |
| Security workers                                                                                     | 22      | 14        | 17        | 36        | 50      | 167       | 72        | 8         |
| Agriculture, forestry and fishery workers                                                            | 46      | 42        | 51        | 62        | 15      | 16        | 15        | 8         |
| Transport and communication workers                                                                  | 28      | 24        | 23        | 38        | 24      | 41        | 20        | 20        |
| Production process and related workers                                                               | 19      | 22        | 15        | 18        | 4       | 5         | 3         | 3         |
| Workers not classifiable by occupation                                                               | 606     | 2,811     | 1,523     | 339       | 173     | 293       | 583       | 58        |
| Non-employed <sup>b</sup>                                                                            | 191     | 185       | 162       | 218       | 22      | 22        | 19        | 23        |
| <i>Kinki region (Mie, Shiga, Kyoto, Osaka, Hyogo, Nara, and Wakayama)</i>                            |         |           |           |           |         |           |           |           |
| Specialist and technical workers                                                                     | 22      | 18        | 14        | 33        | 7       | 9         | 5         | 6         |
| Administrative and managerial workers                                                                | 14      | 10        | 13        | 29        | 27      | 23        | 40        | 17        |
| Clerical workers                                                                                     | 20      | 23        | 18        | 20        | 5       | 8         | 4         | 4         |
| Sales workers                                                                                        | 17      | 23        | 11        | 16        | 7       | 10        | 4         | 4         |
| Service workers                                                                                      | 38      | 29        | 33        | 54        | 8       | 10        | 7         | 6         |
| Security workers                                                                                     | 20      | 20        | 13        | 25        | 55      | 152       | 79        | 12        |
| Agriculture, forestry and fishery workers                                                            | 36      | 37        | 37        | 35        | 17      | 17        | 14        | 21        |
| Transport and communication workers                                                                  | 25      | 24        | 17        | 32        | 26      | 25        | 40        | 20        |
| Production process and related workers                                                               | 15      | 19        | 11        | 13        | 5       | 7         | 4         | 3         |
| Workers not classifiable by occupation                                                               | 529     | 1,417     | 589       | 377       | 183     | 264       | 256       | 121       |
| Non-employed <sup>b</sup>                                                                            | 171     | 183       | 146       | 177       | 18      | 20        | 15        | 20        |
| <i>Chugoku region (Tottori, Shimane, Okayama, Hiroshima, and Yamaguchi)</i>                          |         |           |           |           |         |           |           |           |
| Specialist and technical workers                                                                     | 25      | 16        | 18        | 41        | 7       | 8         | 8         | 6         |
| Administrative and managerial workers                                                                | 18      | 18        | 10        | 25        | 17      | 16        | 14        | 19        |
| Clerical workers                                                                                     | 19      | 20        | 17        | 18        | 4       | 7         | 3         | 3         |
| Sales workers                                                                                        | 22      | 31        | 16        | 19        | 7       | 10        | 5         | 4         |
| Service workers                                                                                      | 45      | 37        | 41        | 56        | 9       | 11        | 7         | 8         |
| Security workers                                                                                     | 20      | 21        | 17        | 24        | 38      | 63        | 0         | 39        |
| Agriculture, forestry and fishery workers                                                            | 56      | 50        | 81        | 55        | 15      | 15        | 20        | 18        |
| Transport and communication workers                                                                  | 23      | 23        | 19        | 29        | 22      | 16        | 17        | 20        |
| Production process and related workers                                                               | 18      | 20        | 15        | 17        | 4       | 5         | 3         | 2         |
| Workers not classifiable by occupation                                                               | 817     | 3,761     | 1,108     | 532       | 249     | 434       | 418       | 167       |
| Non-employed <sup>b</sup>                                                                            | 184     | 190       | 191       | 179       | 22      | 22        | 21        | 23        |
| <i>Shikoku region (Tokushima, Kagawa, Ehime, and Kochi)</i>                                          |         |           |           |           |         |           |           |           |
| Specialist and technical workers                                                                     | 27      | 23        | 16        | 40        | 8       | 10        | 7         | 7         |
| Administrative and managerial workers                                                                | 19      | 13        | 17        | 41        | 36      | 56        | 4         | 26        |
| Clerical workers                                                                                     | 19      | 20        | 17        | 17        | 4       | 6         | 4         | 3         |
| Sales workers                                                                                        | 25      | 34        | 16        | 24        | 8       | 9         | 4         | 9         |
| Service workers                                                                                      | 42      | 29        | 26        | 69        | 12      | 13        | 11        | 11        |
| Security workers                                                                                     | 25      | 18        | 26        | 31        | 0       | 0         | 0         | 0         |
| Agriculture, forestry and fishery workers                                                            | 51      | 49        | 53        | 55        | 16      | 18        | 8         | 8         |
| Transport and communication workers                                                                  | 22      | 24        | 10        | 28        | 22      | 18        | 22        | 17        |
| Production process and related workers                                                               | 20      | 23        | 17        | 18        | 5       | 6         | 5         | 3         |
| Workers not classifiable by occupation                                                               | 394     | 701       | 563       | 324       | 167     | 558       | 161       | 77        |
| Non-employed <sup>b</sup>                                                                            | 160     | 159       | 146       | 174       | 22      | 23        | 22        | 21        |
| <i>Kyushu region (Fukuoka, Saga, Nagasaki, Kumamoto, Oita, Miyazaki, Kagoshima, and Okinawa)</i>     |         |           |           |           |         |           |           |           |
| Specialist and technical workers                                                                     | 28      | 19        | 17        | 45        | 5       | 7         | 5         | 5         |
| Administrative and managerial workers                                                                | 17      | 14        | 9         | 36        | 18      | 9         | 25        | 18        |
| Clerical workers                                                                                     | 22      | 21        | 23        | 23        | 4       | 5         | 4         | 3         |
| Sales workers                                                                                        | 29      | 36        | 21        | 29        | 8       | 10        | 7         | 6         |
| Service workers                                                                                      | 55      | 33        | 47        | 83        | 8       | 9         | 8         | 8         |
| Security workers                                                                                     | 23      | 19        | 19        | 31        | 45      | 46        | 33        | 55        |
| Agriculture, forestry and fishery workers                                                            | 53      | 50        | 54        | 62        | 17      | 18        | 14        | 14        |
| Transport and communication workers                                                                  | 29      | 22        | 25        | 41        | 19      | 13        | 25        | 21        |
| Production process and related workers                                                               | 21      | 22        | 19        | 22        | 5       | 6         | 5         | 3         |
| Workers not classifiable by occupation                                                               | 591     | 1,492     | 741       | 441       | 168     | 299       | 270       | 116       |
| Non-employed <sup>b</sup>                                                                            | 170     | 162       | 156       | 191       | 20      | 19        | 20        | 23        |

<sup>a</sup> Age-adjusted suicide rates were calculated by the direct method, using the model population of 1985 in Japan as a standard. The model population of 1985 is based on the Japanese population under census of 1985 and it is created on the basis of 1,000 persons as 1 unit, after adjusting radical increase or decrease such as baby boom.

<sup>b</sup> Non-employed includes the unemployed as well as the non-labor force.
