# Supplementary material for: Social and Geographical Inequalities in Suicide in Japan from 1975 through 2005: A Census-Based Longitudinal Analysis
Source: PubMed Central journal article supplement (PMC3646025; doi:10.1371/journal.pone.0063443), 2013-05-06
Supplement: pone.0063443.s005.pdf [file pone.0063443.s005.pdf]

**Table S5.** Adjusted prefecture-level residuals for suicide mortality among men, Japan, 1975–2005

| Prefectures  | Overall |            |      | 1975 |            |      | 1980 |            |      | 1985 |            |      | 1990 |            |      | 1995 |            |      | 2000 |            |      | 2005   |            |      |
|--------------|---------|------------|------|------|------------|------|------|------------|------|------|------------|------|------|------------|------|------|------------|------|------|------------|------|--------|------------|------|
|              | OR      | 95% CI     | Rank | OR   | 95% CI     | Rank | OR   | 95% CI     | Rank | OR   | 95% CI     | Rank | OR   | 95% CI     | Rank | OR   | 95% CI     | Rank | OR   | 95% CI     | Rank | OR     | 95% CI     | Rank |
| 1 Hokkaido   | 1.03    | 0.94, 1.12 | 30   | 1.07 | 0.97, 1.18 | 39   | 1.06 | 0.96, 1.16 | 34   | 1.08 | 0.99, 1.18 | 36   | 0.95 | 0.86, 1.05 | 19   | 0.94 | 0.84, 1.05 | 19   | 1.10 | 1.01, 1.20 | 36   | 1.05   | 0.96, 1.16 | 28   |
| 2 Aomori     | 1.16    | 1.05, 1.28 | 41   | 0.98 | 0.86, 1.12 | 17   | 1.11 | 0.97, 1.28 | 43   | 1.07 | 0.93, 1.21 | 34   | 1.03 | 0.88, 1.19 | 29   | 1.22 | 1.04, 1.43 | 40   | 1.13 | 0.99, 1.29 | 37   | 1.55   | 1.36, 1.77 | 46   |
| 3 Iwate      | 1.24    | 1.12, 1.37 | 45   | 1.09 | 0.95, 1.25 | 42   | 1.18 | 1.02, 1.36 | 45   | 1.13 | 0.99, 1.29 | 41   | 1.07 | 0.91, 1.25 | 34   | 1.42 | 1.22, 1.66 | 45   | 1.31 | 1.14, 1.50 | 45   | 1.36   | 1.18, 1.57 | 43   |
| 4 Miyagi     | 0.95    | 0.86, 1.05 | 17   | 0.92 | 0.81, 1.05 | 7    | 0.92 | 0.80, 1.06 | 8    | 0.95 | 0.84, 1.08 | 17   | 0.94 | 0.81, 1.08 | 14   | 0.83 | 0.71, 0.97 | 10   | 0.99 | 0.88, 1.12 | 22   | 1.20   | 1.06, 1.35 | 38   |
| 5 Akita      | 1.36    | 1.23, 1.51 | 47   | 1.01 | 0.88, 1.16 | 26   | 1.08 | 0.93, 1.26 | 36   | 1.33 | 1.16, 1.52 | 47   | 1.23 | 1.05, 1.43 | 45   | 1.64 | 1.40, 1.92 | 47   | 1.55 | 1.35, 1.77 | 47   | 1.64   | 1.42, 1.89 | 47   |
| 6 Yamagata   | 1.11    | 1.00, 1.23 | 39   | 0.99 | 0.86, 1.14 | 19   | 1.03 | 0.88, 1.21 | 31   | 0.90 | 0.77, 1.05 | 10   | 1.03 | 0.87, 1.21 | 30   | 1.26 | 1.06, 1.50 | 44   | 1.24 | 1.07, 1.44 | 43   | 1.39   | 1.19, 1.62 | 45   |
| 7 Fukushima  | 0.98    | 0.89, 1.09 | 21   | 0.89 | 0.78, 1.02 | 2    | 0.87 | 0.75, 1.00 | 4    | 0.97 | 0.85, 1.10 | 19   | 0.86 | 0.74, 0.99 | 2    | 1.07 | 0.92, 1.25 | 33   | 1.09 | 0.96, 1.23 | 33   | 1.38   | 1.21, 1.56 | 44   |
| 8 Ibaraki    | 0.94    | 0.85, 1.03 | 15   | 1.01 | 0.90, 1.14 | 27   | 0.98 | 0.86, 1.11 | 22   | 0.93 | 0.83, 1.05 | 15   | 0.86 | 0.75, 0.99 | 3    | 0.90 | 0.78, 1.04 | 15   | 1.00 | 0.90, 1.12 | 25   | 0.95   | 0.84, 1.08 | 21   |
| 9 Tochigi    | 1.00    | 0.91, 1.10 | 23   | 0.96 | 0.84, 1.10 | 16   | 1.01 | 0.88, 1.17 | 28   | 1.06 | 0.93, 1.20 | 33   | 1.04 | 0.90, 1.21 | 33   | 1.16 | 0.99, 1.34 | 36   | 0.93 | 0.81, 1.05 | 14   | 0.93   | 0.80, 1.07 | 18   |
| 10 Gunma     | 1.00    | 0.91, 1.11 | 24   | 0.99 | 0.87, 1.13 | 21   | 1.09 | 0.95, 1.25 | 39   | 1.07 | 0.94, 1.21 | 35   | 0.93 | 0.80, 1.08 | 12   | 1.06 | 0.91, 1.23 | 30   | 0.88 | 0.77, 1.00 | 10   | 1.04   | 0.91, 1.20 | 25   |
| 11 Saitama   | 0.84    | 0.77, 0.92 | 4    | 0.91 | 0.82, 1.01 | 4    | 0.91 | 0.82, 1.01 | 6    | 0.87 | 0.79, 0.96 | 8    | 0.89 | 0.80, 0.99 | 6    | 0.82 | 0.74, 0.92 | 8    | 0.78 | 0.71, 0.85 | 5    | 0.71   | 0.64, 0.78 | 3    |
| 12 Chiba     | 0.85    | 0.77, 0.93 | 5    | 0.92 | 0.83, 1.02 | 8    | 0.84 | 0.75, 0.94 | 2    | 0.83 | 0.75, 0.91 | 2    | 0.87 | 0.78, 0.96 | 4    | 0.80 | 0.71, 0.89 | 6    | 0.84 | 0.77, 0.91 | 8    | 0.81   | 0.73, 0.90 | 7    |
| 13 Tokyo     | 0.86    | 0.79, 0.94 | 6    | 0.95 | 0.88, 1.02 | 13   | 0.92 | 0.85, 1.00 | 9    | 0.82 | 0.76, 0.88 | 1    | 0.90 | 0.83, 0.98 | 8    | 0.78 | 0.72, 0.86 | 2    | 0.78 | 0.72, 0.83 | 4    | 0.73   | 0.67, 0.80 | 4    |
| 14 Kanagawa  | 0.83    | 0.76, 0.90 | 3    | 0.89 | 0.81, 0.98 | 1    | 0.75 | 0.68, 0.83 | 1    | 0.87 | 0.79, 0.95 | 7    | 0.89 | 0.81, 0.98 | 7    | 0.79 | 0.71, 0.87 | 4    | 0.83 | 0.76, 0.89 | 7    | 0.69   | 0.63, 0.76 | 2    |
| 15 Niigata   | 1.22    | 1.11, 1.34 | 43   | 1.10 | 0.97, 1.25 | 43   | 1.10 | 0.97, 1.25 | 42   | 1.21 | 1.08, 1.35 | 44   | 1.32 | 1.16, 1.50 | 47   | 1.24 | 1.08, 1.42 | 42   | 1.35 | 1.21, 1.51 | 46   | 1.24   | 1.10, 1.40 | 41   |
| 16 Toyama    | 1.17    | 1.05, 1.29 | 42   | 0.96 | 0.83, 1.12 | 15   | 1.09 | 0.93, 1.29 | 40   | 1.22 | 1.05, 1.42 | 45   | 1.24 | 1.04, 1.47 | 46   | 1.21 | 1.00, 1.46 | 38   | 1.10 | 0.94, 1.29 | 35   | 1.23   | 1.04, 1.45 | 40   |
| 17 Ishikawa  | 1.05    | 0.94, 1.17 | 34   | 1.04 | 0.89, 1.20 | 35   | 1.11 | 0.95, 1.31 | 44   | 1.03 | 0.88, 1.20 | 27   | 1.07 | 0.90, 1.27 | 36   | 0.92 | 0.75, 1.13 | 16   | 0.98 | 0.84, 1.15 | 21   | 1.15   | 0.98, 1.36 | 36   |
| 18 Fukui     | 1.01    | 0.90, 1.13 | 27   | 0.93 | 0.79, 1.10 | 10   | 0.98 | 0.82, 1.17 | 23   | 0.98 | 0.82, 1.17 | 20   | 0.97 | 0.80, 1.18 | 24   | 1.12 | 0.90, 1.38 | 35   | 1.13 | 0.95, 1.35 | 38   | 1.08   | 0.88, 1.31 | 32   |
| 19 Yamanashi | 1.07    | 0.96, 1.20 | 37   | 1.00 | 0.86, 1.17 | 25   | 0.94 | 0.78, 1.13 | 11   | 0.99 | 0.84, 1.18 | 22   | 1.07 | 0.89, 1.28 | 35   | 1.10 | 0.90, 1.36 | 34   | 1.21 | 1.02, 1.42 | 41   | 1.21   | 1.01, 1.44 | 39   |
| 20 Nagano    | 1.01    | 0.92, 1.12 | 28   | 1.02 | 0.90, 1.16 | 32   | 0.97 | 0.85, 1.12 | 21   | 1.05 | 0.92, 1.19 | 31   | 0.99 | 0.85, 1.14 | 26   | 1.00 | 0.85, 1.17 | 27   | 0.99 | 0.87, 1.13 | 23   | 1.15   | 1.01, 1.31 | 35   |
| 21 Gifu      | 1.01    | 0.91, 1.12 | 26   | 1.12 | 0.98, 1.29 | 44   | 0.95 | 0.82, 1.11 | 17   | 1.03 | 0.90, 1.18 | 29   | 1.03 | 0.89, 1.20 | 32   | 0.84 | 0.70, 0.99 | 11   | 1.03 | 0.90, 1.17 | 29   | 1.06   | 0.92, 1.22 | 29   |
| 22 Shizuoka  | 0.98    | 0.89, 1.07 | 19   | 1.07 | 0.95, 1.19 | 37   | 1.04 | 0.93, 1.17 | 32   | 1.01 | 0.90, 1.12 | 24   | 0.96 | 0.85, 1.09 | 23   | 0.94 | 0.83, 1.08 | 20   | 0.93 | 0.84, 1.03 | 16   | 0.93   | 0.82, 1.04 | 19   |
| 23 Aichi     | 0.89    | 0.82, 0.98 | 9    | 1.01 | 0.92, 1.11 | 28   | 0.86 | 0.78, 0.96 | 3    | 0.86 | 0.78, 0.94 | 5    | 0.89 | 0.80, 0.98 | 5    | 0.93 | 0.83, 1.03 | 17   | 0.90 | 0.83, 0.98 | 11   | 0.87   | 0.78, 0.96 | 13   |
| 24 Mie       | 0.88    | 0.79, 0.97 | 8    | 0.90 | 0.78, 1.04 | 3    | 0.95 | 0.82, 1.10 | 14   | 0.92 | 0.80, 1.06 | 13   | 0.95 | 0.81, 1.10 | 18   | 0.88 | 0.74, 1.04 | 13   | 0.94 | 0.82, 1.07 | 17   | 0.82   | 0.70, 0.96 | 10   |
| 25 Shiga     | 0.91    | 0.82, 1.01 | 10   | 0.99 | 0.85, 1.15 | 22   | 0.92 | 0.78, 1.10 | 10   | 1.00 | 0.85, 1.17 | 23   | 0.96 | 0.80, 1.14 | 20   | 0.98 | 0.81, 1.19 | 23   | 0.81 | 0.69, 0.95 | 6    | 0.89   | 0.75, 1.06 | 14   |
| 26 Kyoto     | 0.92    | 0.84, 1.02 | 11   | 1.02 | 0.91, 1.16 | 34   | 1.01 | 0.89, 1.15 | 26   | 0.89 | 0.78, 1.00 | 9    | 0.94 | 0.82, 1.08 | 17   | 0.82 | 0.71, 0.95 | 9    | 0.92 | 0.82, 1.04 | 13   | 0.84   | 0.74, 0.97 | 12   |
| 27 Osaka     | 0.93    | 0.85, 1.01 | 13   | 1.16 | 1.07, 1.26 | 47   | 0.96 | 0.88, 1.04 | 18   | 0.85 | 0.78, 0.92 | 3    | 0.94 | 0.86, 1.03 | 16   | 0.79 | 0.71, 0.87 | 3    | 0.95 | 0.88, 1.03 | 18   | 0.73   | 0.67, 0.81 | 5    |
| 28 Hyogo     | 0.93    | 0.84, 1.01 | 12   | 1.04 | 0.94, 1.14 | 36   | 1.03 | 0.93, 1.14 | 30   | 0.92 | 0.84, 1.01 | 14   | 0.90 | 0.81, 1.00 | 9    | 0.81 | 0.72, 0.91 | 7    | 0.88 | 0.80, 0.96 | 9    | 0.83   | 0.74, 0.92 | 11   |
| 29 Nara      | 0.76    | 0.68, 0.85 | 1    | 0.92 | 0.78, 1.07 | 5    | 0.91 | 0.77, 1.08 | 7    | 0.85 | 0.72, 0.99 | 4    | 0.91 | 0.77, 1.08 | 11   | 0.63 | 0.51, 0.78 | 1    | 0.71 | 0.61, 0.84 | 1    | 0.67   | 0.55, 0.80 | 1    |
| 30 Wakayama  | 1.00    | 0.90, 1.12 | 25   | 0.93 | 0.80, 1.08 | 9    | 0.97 | 0.83, 1.14 | 20   | 1.22 | 1.06, 1.41 | 46   | 0.96 | 0.81, 1.14 | 22   | 0.96 | 0.80, 1.17 | 21   | 1.00 | 0.86, 1.17 | 26   | 1.01   | 0.85, 1.20 | 23   |
| 31 Tottori   | 1.06    | 0.94, 1.19 | 35   | 0.95 | 0.81, 1.12 | 14   | 1.08 | 0.90, 1.30 | 35   | 0.93 | 0.77, 1.13 | 16   | 1.10 | 0.90, 1.34 | 38   | 1.22 | 0.98, 1.53 | 41   | 0.98 | 0.81, 1.19 | 20   | 1.18   | 0.96, 1.45 | 37   |
| 32 Shimane   | 1.27    | 1.14, 1.42 | 46   | 1.09 | 0.93, 1.27 | 41   | 1.30 | 1.08, 1.55 | 47   | 1.16 | 0.98, 1.38 | 43   | 1.17 | 0.97, 1.40 | 42   | 1.54 | 1.26, 1.88 | 46   | 1.22 | 1.02, 1.45 | 42   | 1.07   | 0.87, 1.30 | 31   |
| 33 Okayama   | 0.87    | 0.79, 0.97 | 7    | 1.00 | 0.88, 1.14 | 24   | 0.99 | 0.86, 1.14 | 25   | 0.90 | 0.79, 1.03 | 11   | 0.98 | 0.84, 1.13 | 25   | 0.88 | 0.74, 1.04 | 12   | 0.76 | 0.66, 0.88 | 3    | 0.78   | 0.67, 0.92 | 6    |
| 34 Hiroshima | 0.97    | 0.88, 1.07 | 18   | 0.99 | 0.88, 1.11 | 18   | 0.98 | 0.87, 1.12 | 24   | 1.03 | 0.92, 1.15 | 28   | 1.11 | 0.98, 1.25 | 39   | 1.00 | 0.87, 1.14 | 26   | 0.93 | 0.83, 1.04 | 15   | 0.82   | 0.72, 0.94 | 9    |
| 35 Yamaguchi | 1.07    | 0.97, 1.18 | 36   | 1.14 | 0.99, 1.32 | 46   | 1.09 | 0.95, 1.26 | 41   | 1.10 | 0.96, 1.25 | 38   | 1.12 | 0.97, 1.31 | 40   | 0.99 | 0.83, 1.17 | 24   | 1.05 | 0.91, 1.20 | 31   | 0.92   | 0.78, 1.08 | 17   |
| 36 Tokushima | 0.81    | 0.72, 0.91 | 2    | 0.95 | 0.81, 1.10 | 11   | 0.96 | 0.81, 1.14 | 19   | 0.86 | 0.73, 1.02 | 6    | 0.83 | 0.69, 1.01 | 1    | 0.80 | 0.64, 0.99 | 5    | 0.74 | 0.62, 0.90 | 2    | 0.82   | 0.67, 1.00 | 8    |
| 37 Kagawa    | 0.95    | 0.85, 1.06 | 16   | 1.07 | 0.92, 1.24 | 38   | 0.95 | 0.80, 1.12 | 12   | 0.96 | 0.82, 1.13 | 18   | 0.96 | 0.81, 1.14 | 21   | 0.88 | 0.72, 1.09 | 14   | 0.96 | 0.81, 1.13 | 19   | 0.94   | 0.78, 1.12 | 20   |
| 38 Ehime     | 1.00    | 0.90, 1.10 | 22   | 1.02 | 0.89, 1.16 | 29   | 1.01 | 0.87, 1.17 | 27   | 1.02 | 0.89, 1.17 | 25   | 1.01 | 0.87, 1.18 | 28   | 1.04 | 0.88, 1.24 | 29   | 1.02 | 0.88, 1.17 | 28   | 0.92   | 0.78, 1.07 | 16   |
| 39 Kochi     | 1.05    | 0.94, 1.17 | 33   | 1.07 | 0.92, 1.25 | 40   | 1.05 | 0.89, 1.24 | 33   | 1.10 | 0.95, 1.28 | 39   | 0.99 | 0.83, 1.18 | 27   | 0.93 | 0.76, 1.14 | 18   | 1.01 | 0.85, 1.20 | 27   | 1.04   | 0.87, 1.25 | 26   |
| 40 Fukuoka   | 1.03    | 0.94, 1.13 | 31   | 1.02 | 0.92, 1.12 | 30   | 0.95 | 0.86, 1.05 | 15   | 1.02 | 0.93, 1.12 | 26   | 1.08 | 0.98, 1.20 | 37   | 1.06 | 0.95, 1.18 | 31   | 1.04 | 0.95, 1.13 | 30   | 1.04   | 0.94, 1.15 | 27   |
| 41 Saga      | 1.09    | 0.97, 1.21 | 38   | 1.00 | 0.85, 1.16 | 23   | 1.09 | 0.92, 1.29 | 37   | 1.11 | 0.94, 1.31 | 40   | 1.03 | 0.86, 1.24 | 31   | 1.07 | 0.87, 1.32 | 32   | 1.18 | 1.00, 1.39 | 39   | 1.01   | 0.84, 1.22 | 24   |
| 42 Nagasaki  | 1.04    | 0.94, 1.15 | 32   | 1.02 | 0.89, 1.16 | 31   | 0.95 | 0.82, 1.10 | 13   | 1.05 | 0.93, 1.20 | 32   | 0.93 | 0.80, 1.09 | 13   | 1.01 | 0.86, 1.20 | 28   | 1.10 | 0.96, 1.25 | 34   | 1.25   | 1.08, 1.44 | 42   |
| 43 Kumamoto  | 0.94    | 0.85, 1.03 | 14   | 0.92 | 0.80, 1.05 | 6    | 0.95 | 0.83, 1.10 | 16   | 0.98 | 0.86, 1.11 | 21   | 0.90 | 0.78, 1.05 | 10   | 0.97 | 0.83, 1.14 | 22   | 0.91 | 0.80, 1.04 | 12   | 1.06   | 0.92, 1.22 | 30   |
| 44 Oita      | 0.98    | 0.88, 1.09 | 20   | 0.99 | 0.86, 1.14 | 20   | 1.03 | 0.88, 1.20 | 29   | 1.05 | 0.90, 1.21 | 30   | 0.94 | 0.80, 1.11 | 15   | 1.00 | 0.83, 1.20 | 25   | 0.99 | 0.86, 1.16 | 24   | 0.90   | 0.76, 1.07 | 15   |
| 45 Miyazaki  | 1.23    | 1.11, 1.36 | 44   | 1.14 | 0.98, 1.32 | 45   | 1.29 | 1.10, 1.51 | 46   | 1.09 | 0.94, 1.25 | 37   | 1.21 | 1.04, 1.42 | 43   | 1.22 | 1.02, 1.45 | 39   | 1.27 | 1.10, 1.46 | 44   | 1.13   | 0.96, 1.32 | 34   |
| 46 Kagoshima | 1.13    | 1.03, 1.25 | 40   | 1.02 | 0.90, 1.16 | 33   | 1.09 | 0.95, 1.25 | 38   | 1.14 | 1.00, 1.29 | 42   | 1.14 | 0.99, 1.31 | 41   | 1.25 | 1.07, 1.45 | 43   | 1.18 | 1.04, 1.34 | 40   | 1.10</ |            |      |
