# Supplementary material for: Social and Geographical Inequalities in Suicide in Japan from 1975 through 2005: A Census-Based Longitudinal Analysis
Source: PubMed Central journal article supplement (PMC3646025; doi:10.1371/journal.pone.0063443), 2013-05-06
Supplement: pone.0063443.s006.pdf [file pone.0063443.s006.pdf]

**Table S6.** Adjusted prefecture-level residuals for suicide mortality among women, Japan, 1975–2005

| Prefectures  | Overall |            |      | 1975 |            |      | 1980 |            |      | 1985 |            |      | 1990 |            |      | 1995 |            |      | 2000 |            |      | 2005 |            |      |
|--------------|---------|------------|------|------|------------|------|------|------------|------|------|------------|------|------|------------|------|------|------------|------|------|------------|------|------|------------|------|
|              | OR      | 95% CI     | Rank | OR   | 95% CI     | Rank | OR   | 95% CI     | Rank | OR   | 95% CI     | Rank | OR   | 95% CI     | Rank | OR   | 95% CI     | Rank | OR   | 95% CI     | Rank | OR   | 95% CI     | Rank |
| 1 Hokkaido   | 0.92    | 0.85, 0.99 | 9    | 1.04 | 0.93, 1.16 | 34   | 0.92 | 0.82, 1.04 | 7    | 0.98 | 0.86, 1.11 | 20   | 0.84 | 0.73, 0.96 | 2    | 0.83 | 0.71, 0.96 | 5    | 0.95 | 0.84, 1.07 | 17   | 1.02 | 0.90, 1.15 | 32   |
| 2 Aomori     | 1.02    | 0.93, 1.13 | 30   | 0.92 | 0.78, 1.08 | 6    | 1.06 | 0.90, 1.24 | 38   | 1.01 | 0.83, 1.23 | 24   | 1.09 | 0.91, 1.30 | 40   | 0.97 | 0.78, 1.21 | 20   | 1.11 | 0.92, 1.33 | 40   | 1.01 | 0.83, 1.21 | 29   |
| 3 Iwate      | 1.18    | 1.07, 1.31 | 46   | 1.12 | 0.95, 1.33 | 46   | 0.98 | 0.83, 1.16 | 16   | 1.18 | 0.97, 1.44 | 44   | 1.02 | 0.85, 1.22 | 29   | 1.24 | 0.99, 1.54 | 45   | 1.14 | 0.94, 1.38 | 43   | 1.21 | 0.99, 1.49 | 47   |
| 4 Miyagi     | 0.92    | 0.83, 1.01 | 10   | 1.00 | 0.86, 1.17 | 21   | 0.91 | 0.77, 1.07 | 5    | 1.01 | 0.85, 1.21 | 23   | 0.92 | 0.77, 1.10 | 9    | 1.01 | 0.83, 1.24 | 24   | 0.92 | 0.77, 1.10 | 10   | 0.91 | 0.76, 1.08 | 6    |
| 5 Akita      | 1.22    | 1.10, 1.35 | 47   | 1.06 | 0.90, 1.25 | 40   | 1.04 | 0.88, 1.23 | 34   | 1.26 | 1.04, 1.54 | 45   | 1.05 | 0.87, 1.26 | 36   | 1.29 | 1.03, 1.62 | 47   | 1.22 | 0.99, 1.50 | 46   | 1.15 | 0.94, 1.40 | 45   |
| 6 Yamagata   | 1.05    | 0.94, 1.17 | 34   | 1.01 | 0.85, 1.19 | 23   | 1.09 | 0.92, 1.30 | 44   | 1.06 | 0.86, 1.30 | 30   | 0.96 | 0.79, 1.17 | 14   | 1.14 | 0.90, 1.44 | 38   | 0.93 | 0.76, 1.15 | 12   | 1.08 | 0.88, 1.32 | 37   |
| 7 Fukushima  | 1.02    | 0.93, 1.12 | 29   | 0.88 | 0.74, 1.04 | 2    | 0.99 | 0.84, 1.16 | 19   | 1.11 | 0.93, 1.33 | 36   | 1.09 | 0.92, 1.29 | 41   | 1.09 | 0.89, 1.33 | 33   | 0.98 | 0.82, 1.18 | 23   | 1.11 | 0.93, 1.32 | 41   |
| 8 Ibaraki    | 0.98    | 0.90, 1.07 | 19   | 0.93 | 0.80, 1.08 | 10   | 1.01 | 0.87, 1.17 | 26   | 1.15 | 0.98, 1.36 | 41   | 1.04 | 0.89, 1.22 | 34   | 0.94 | 0.78, 1.13 | 18   | 0.89 | 0.76, 1.05 | 5    | 0.99 | 0.85, 1.16 | 26   |
| 9 Tochigi    | 1.01    | 0.92, 1.12 | 28   | 0.91 | 0.77, 1.07 | 5    | 1.07 | 0.91, 1.27 | 42   | 1.14 | 0.94, 1.37 | 40   | 1.12 | 0.94, 1.34 | 43   | 0.90 | 0.72, 1.13 | 13   | 1.09 | 0.92, 1.30 | 38   | 0.90 | 0.75, 1.09 | 5    |
| 10 Gunma     | 1.14    | 1.03, 1.25 | 42   | 0.99 | 0.85, 1.15 | 17   | 1.13 | 0.96, 1.33 | 46   | 1.28 | 1.07, 1.54 | 47   | 1.10 | 0.92, 1.31 | 42   | 1.20 | 0.98, 1.46 | 44   | 1.08 | 0.91, 1.28 | 37   | 0.97 | 0.81, 1.17 | 17   |
| 11 Saitama   | 0.91    | 0.84, 0.98 | 7    | 0.98 | 0.87, 1.11 | 16   | 1.02 | 0.90, 1.15 | 27   | 0.81 | 0.71, 0.94 | 2    | 0.98 | 0.87, 1.11 | 18   | 0.91 | 0.79, 1.05 | 15   | 0.88 | 0.79, 1.00 | 4    | 0.89 | 0.78, 1.00 | 4    |
| 12 Chiba     | 0.82    | 0.75, 0.89 | 2    | 0.88 | 0.77, 1.01 | 3    | 0.83 | 0.72, 0.96 | 2    | 0.83 | 0.72, 0.96 | 6    | 0.84 | 0.72, 0.96 | 1    | 0.77 | 0.66, 0.90 | 2    | 0.89 | 0.79, 1.01 | 7    | 0.91 | 0.80, 1.03 | 7    |
| 13 Tokyo     | 0.97    | 0.91, 1.04 | 17   | 0.99 | 0.90, 1.09 | 19   | 0.90 | 0.82, 1.00 | 3    | 0.93 | 0.84, 1.04 | 15   | 0.96 | 0.86, 1.06 | 12   | 0.90 | 0.80, 1.01 | 12   | 1.03 | 0.93, 1.13 | 29   | 1.09 | 0.99, 1.20 | 39   |
| 14 Kanagawa  | 0.79    | 0.74, 0.86 | 1    | 0.86 | 0.76, 0.97 | 1    | 0.77 | 0.67, 0.88 | 1    | 0.76 | 0.67, 0.87 | 1    | 0.90 | 0.80, 1.02 | 5    | 0.80 | 0.70, 0.91 | 3    | 0.87 | 0.78, 0.98 | 3    | 0.80 | 0.71, 0.91 | 1    |
| 15 Niigata   | 1.15    | 1.05, 1.26 | 43   | 1.04 | 0.90, 1.20 | 33   | 1.07 | 0.92, 1.24 | 40   | 1.08 | 0.91, 1.28 | 33   | 1.18 | 1.00, 1.40 | 46   | 1.16 | 0.96, 1.41 | 41   | 1.26 | 1.06, 1.49 | 47   | 1.04 | 0.88, 1.23 | 34   |
| 16 Toyama    | 1.18    | 1.05, 1.32 | 44   | 0.99 | 0.84, 1.17 | 18   | 1.02 | 0.86, 1.22 | 29   | 1.08 | 0.87, 1.35 | 35   | 1.13 | 0.93, 1.39 | 44   | 1.16 | 0.91, 1.47 | 40   | 1.16 | 0.94, 1.44 | 45   | 1.20 | 0.97, 1.48 | 46   |
| 17 Ishikawa  | 1.00    | 0.89, 1.13 | 25   | 1.03 | 0.87, 1.22 | 32   | 1.02 | 0.85, 1.21 | 28   | 1.07 | 0.86, 1.33 | 32   | 0.98 | 0.80, 1.19 | 17   | 1.03 | 0.80, 1.31 | 25   | 0.92 | 0.74, 1.13 | 9    | 1.02 | 0.83, 1.24 | 31   |
| 18 Fukui     | 0.98    | 0.86, 1.12 | 21   | 1.00 | 0.84, 1.20 | 22   | 0.95 | 0.79, 1.15 | 8    | 0.82 | 0.63, 1.07 | 4    | 1.01 | 0.82, 1.25 | 26   | 1.12 | 0.86, 1.45 | 37   | 1.00 | 0.80, 1.24 | 26   | 1.08 | 0.87, 1.34 | 38   |
| 19 Yamanashi | 1.04    | 0.92, 1.18 | 33   | 1.02 | 0.85, 1.21 | 27   | 1.02 | 0.85, 1.23 | 30   | 1.17 | 0.92, 1.48 | 42   | 1.05 | 0.85, 1.29 | 35   | 1.08 | 0.83, 1.39 | 31   | 0.91 | 0.73, 1.13 | 8    | 0.98 | 0.80, 1.21 | 20   |
| 20 Nagano    | 1.08    | 0.98, 1.19 | 37   | 1.05 | 0.90, 1.22 | 38   | 0.92 | 0.78, 1.09 | 6    | 1.12 | 0.94, 1.34 | 38   | 1.14 | 0.96, 1.36 | 45   | 1.17 | 0.96, 1.44 | 42   | 1.11 | 0.94, 1.32 | 41   | 0.99 | 0.83, 1.18 | 24   |
| 21 Gifu      | 1.06    | 0.96, 1.16 | 35   | 1.09 | 0.93, 1.27 | 43   | 1.05 | 0.89, 1.23 | 36   | 1.12 | 0.93, 1.35 | 37   | 1.00 | 0.84, 1.19 | 23   | 0.96 | 0.77, 1.18 | 19   | 0.94 | 0.78, 1.12 | 13   | 1.12 | 0.94, 1.33 | 42   |
| 22 Shizuoka  | 0.88    | 0.81, 0.96 | 4    | 0.97 | 0.85, 1.11 | 14   | 0.98 | 0.85, 1.13 | 14   | 0.82 | 0.69, 0.97 | 3    | 1.01 | 0.87, 1.17 | 25   | 0.76 | 0.62, 0.93 | 1    | 0.86 | 0.74, 1.01 | 2    | 0.98 | 0.84, 1.14 | 19   |
| 23 Aichi     | 0.94    | 0.87, 1.02 | 13   | 1.10 | 0.98, 1.23 | 45   | 1.00 | 0.89, 1.12 | 22   | 0.89 | 0.78, 1.02 | 11   | 0.92 | 0.81, 1.05 | 10   | 0.98 | 0.85, 1.13 | 22   | 0.94 | 0.83, 1.06 | 14   | 0.88 | 0.77, 1.00 | 3    |
| 24 Mie       | 0.89    | 0.80, 0.99 | 5    | 0.92 | 0.78, 1.09 | 7    | 1.00 | 0.85, 1.18 | 21   | 0.90 | 0.73, 1.10 | 12   | 0.92 | 0.77, 1.10 | 8    | 0.85 | 0.68, 1.07 | 6    | 0.97 | 0.81, 1.16 | 20   | 0.99 | 0.83, 1.19 | 25   |
| 25 Shiga     | 0.91    | 0.81, 1.02 | 6    | 1.01 | 0.85, 1.20 | 25   | 1.03 | 0.87, 1.23 | 32   | 0.82 | 0.65, 1.05 | 5    | 0.98 | 0.81, 1.20 | 19   | 0.83 | 0.64, 1.07 | 4    | 0.92 | 0.76, 1.12 | 11   | 0.97 | 0.80, 1.18 | 16   |
| 26 Kyoto     | 0.98    | 0.89, 1.07 | 18   | 1.02 | 0.89, 1.18 | 29   | 1.01 | 0.87, 1.17 | 25   | 0.98 | 0.83, 1.16 | 19   | 0.96 | 0.82, 1.13 | 13   | 0.94 | 0.78, 1.13 | 16   | 0.96 | 0.82, 1.13 | 19   | 0.99 | 0.84, 1.16 | 23   |
| 27 Osaka     | 0.93    | 0.87, 1.00 | 11   | 1.20 | 1.08, 1.32 | 47   | 0.95 | 0.86, 1.06 | 9    | 0.84 | 0.75, 0.95 | 7    | 0.86 | 0.76, 0.96 | 4    | 0.86 | 0.75, 0.97 | 8    | 0.94 | 0.84, 1.04 | 15   | 0.92 | 0.82, 1.03 | 9    |
| 28 Hyogo     | 0.95    | 0.88, 1.02 | 15   | 1.05 | 0.94, 1.18 | 39   | 1.10 | 0.98, 1.23 | 45   | 0.86 | 0.75, 0.99 | 9    | 0.90 | 0.79, 1.03 | 6    | 0.87 | 0.75, 1.01 | 9    | 0.89 | 0.79, 1.01 | 6    | 1.01 | 0.89, 1.14 | 28   |
| 29 Nara      | 0.84    | 0.75, 0.94 | 3    | 1.02 | 0.86, 1.20 | 28   | 1.00 | 0.85, 1.19 | 23   | 0.87 | 0.70, 1.08 | 10   | 0.84 | 0.69, 1.03 | 3    | 0.88 | 0.70, 1.10 | 10   | 0.80 | 0.65, 0.99 | 1    | 0.88 | 0.72, 1.07 | 2    |
| 30 Wakayama  | 1.07    | 0.96, 1.19 | 36   | 1.07 | 0.91, 1.27 | 41   | 1.06 | 0.89, 1.26 | 39   | 1.07 | 0.86, 1.32 | 31   | 0.91 | 0.75, 1.11 | 7    | 1.10 | 0.87, 1.38 | 35   | 0.97 | 0.80, 1.19 | 21   | 1.09 | 0.90, 1.33 | 40   |
| 31 Tottori   | 1.00    | 0.87, 1.14 | 24   | 0.96 | 0.80, 1.16 | 13   | 0.98 | 0.80, 1.18 | 13   | 1.03 | 0.80, 1.33 | 27   | 1.01 | 0.82, 1.26 | 27   | 1.04 | 0.79, 1.37 | 27   | 1.05 | 0.84, 1.32 | 33   | 0.98 | 0.79, 1.23 | 22   |
| 32 Shimane   | 1.10    | 0.97, 1.24 | 40   | 1.03 | 0.86, 1.23 | 30   | 1.05 | 0.87, 1.27 | 37   | 1.13 | 0.90, 1.44 | 39   | 1.05 | 0.85, 1.30 | 37   | 1.08 | 0.82, 1.41 | 30   | 1.08 | 0.86, 1.34 | 35   | 0.95 | 0.76, 1.18 | 11   |
| 33 Okayama   | 0.94    | 0.85, 1.05 | 14   | 0.90 | 0.77, 1.06 | 4    | 1.03 | 0.88, 1.21 | 31   | 0.85 | 0.69, 1.04 | 8    | 1.06 | 0.89, 1.26 | 38   | 0.94 | 0.76, 1.16 | 17   | 1.03 | 0.86, 1.22 | 30   | 0.97 | 0.81, 1.16 | 13   |
| 34 Hiroshima | 1.01    | 0.92, 1.10 | 26   | 1.10 | 0.95, 1.27 | 44   | 1.03 | 0.89, 1.20 | 33   | 0.96 | 0.81, 1.14 | 17   | 1.04 | 0.89, 1.22 | 32   | 1.03 | 0.86, 1.23 | 26   | 0.98 | 0.84, 1.14 | 22   | 0.91 | 0.77, 1.08 | 8    |
| 35 Yamaguchi | 1.09    | 0.99, 1.21 | 39   | 1.04 | 0.89, 1.22 | 36   | 1.08 | 0.92, 1.28 | 43   | 1.08 | 0.89, 1.31 | 34   | 0.94 | 0.78, 1.14 | 11   | 1.15 | 0.93, 1.42 | 39   | 1.04 | 0.86, 1.25 | 32   | 1.13 | 0.94, 1.37 | 44   |
| 36 Tokushima | 0.99    | 0.88, 1.12 | 22   | 1.01 | 0.85, 1.20 | 24   | 1.00 | 0.83, 1.19 | 20   | 1.03 | 0.82, 1.29 | 26   | 1.04 | 0.85, 1.27 | 31   | 0.98 | 0.75, 1.27 | 21   | 0.94 | 0.76, 1.17 | 16   | 0.98 | 0.80, 1.21 | 21   |
| 37 Kagawa    | 1.03    | 0.92, 1.15 | 31   | 1.04 | 0.88, 1.24 | 37   | 0.98 | 0.82, 1.18 | 17   | 1.02 | 0.82, 1.28 | 25   | 1.07 | 0.88, 1.30 | 39   | 1.09 | 0.86, 1.39 | 34   | 0.96 | 0.78, 1.18 | 18   | 0.98 | 0.80, 1.20 | 18   |
| 38 Ehime     | 1.03    | 0.93, 1.15 | 32   | 1.00 | 0.85, 1.17 | 20   | 1.00 | 0.85, 1.18 | 24   | 1.17 | 0.97, 1.42 | 43   | 1.02 | 0.85, 1.22 | 28   | 1.00 | 0.80, 1.25 | 23   | 1.02 | 0.85, 1.23 | 27   | 1.01 | 0.84, 1.21 | 30   |
| 39 Kochi     | 1.08    | 0.96, 1.22 | 38   | 1.01 | 0.85, 1.21 | 26   | 1.05 | 0.87, 1.25 | 35   | 1.05 | 0.83, 1.32 | 29   | 0.99 | 0.80, 1.21 | 20   | 1.08 | 0.84, 1.40 | 32   | 1.03 | 0.83, 1.27 | 31   | 1.12 | 0.91, 1.39 | 43   |
| 40 Fukuoka   | 0.94    | 0.87, 1.02 | 12   | 0.93 | 0.82, 1.05 | 8    | 0.97 | 0.86, 1.10 | 11   | 0.97 | 0.84, 1.11 | 18   | 0.99 | 0.87, 1.13 | 21   | 0.91 | 0.78, 1.06 | 14   | 0.98 | 0.87, 1.12 | 24   | 0.96 | 0.84, 1.10 | 12   |
| 41 Saga      | 0.99    | 0.88, 1.12 | 23   | 0.95 | 0.79, 1.14 | 11   | 0.97 | 0.81, 1.17 | 12   | 0.91 | 0.71, 1.16 | 14   | 1.04 | 0.85, 1.27 | 33   | 1.07 | 0.83, 1.38 | 28   | 1.08 | 0.87, 1.33 | 36   | 1.02 | 0.83, 1.26 | 33   |
| 42 Nagasaki  | 0.96    | 0.86, 1.06 | 16   | 0.98 | 0.84, 1.15 | 15   | 0.98 | 0.84, 1.16 | 18   | 0.95 | 0.78, 1.16 | 16   | 0.97 | 0.82, 1.17 | 15   | 0.90 | 0.71, 1.13 | 11   | 1.10 | 0.92, 1.33 | 39   | 0.97 | 0.81, 1.17 | 14   |
| 43 Kumamoto  | 1.01    | 0.92, 1.12 | 27   | 1.03 | 0.88, 1.20 | 31   | 0.96 | 0.82, 1.13 | 10   | 0.91 | 0.75, 1.11 | 13   | 0.99 | 0.83, 1.18 | 22   | 1.11 | 0.91, 1.37 | 36   | 1.05 | 0.88, 1.25 | 34   | 1.07 | 0.90, 1.28 | 36   |
| 44 Oita      | 0.98    | 0.88, 1.10 | 20   | 0.95 | 0.80, 1.12 | 12   | 0.98 | 0.83, 1.17 | 15   | 1.00 | 0.81, 1.23 | 22   | 0.98 | 0.81, 1.18 | 16   | 1.07 | 0.85, 1.35 | 29   | 1.12 | 0.93, 1.36 | 42   | 0.92 | 0.76, 1.13 | 10   |
| 45 Miyazaki  | 1.13    | 1.01, 1.26 | 41   | 1.04 | 0.88, 1.23 | 35   | 1.07 | 0.90, 1.28 | 41   | 1.00 | 0.81, 1.24 | 21   | 1.02 | 0.84, 1.23 | 30   | 1.28 | 1.01, 1.62 | 46   | 1.16 | 0.95, 1.42 | 44   | 1.05 | 0.86, 1.29 | 35   |
| 46 Kagoshima | 1.18    | 1.07, 1.29 | 45   | 1.08 | 0.92, 1.26 | 42   | 1.14 | 0.97, 1.34 | 47   | 1.27 | 1.07, 1.52 | 46   | 1.23 | 1.03, 1.47 | 47   | 1.18 | 0.96, 1.44 | 43   | 1.02 | 0.85, 1.23 | 28   |      |            |      |
