# Supplementary material for: Social and Geographical Inequalities in Suicide in Japan from 1975 through 2005: A Census-Based Longitudinal Analysis
Source: PubMed Central journal article supplement (PMC3646025; doi:10.1371/journal.pone.0063443), 2013-05-06
Supplement: pone.0063443.s007.pdf [file pone.0063443.s007.pdf]

**Table S7.** The number of deaths classified as undetermined intent among those aged 25–64 years, Japan, 1975–2005<sup>a</sup>

|       | 1975 |                | 1980 |      | 1985  |      | 1990  |       | 1995 |      | 2000 |      | 2005 |      |
|-------|------|----------------|------|------|-------|------|-------|-------|------|------|------|------|------|------|
|       | N    | % <sup>b</sup> | N    | %    | N     | %    | N     | %     | N    | %    | N    | %    | N    | %    |
| Men   | 546  | 6.63           | 850  | 8.65 | 1,030 | 8.34 | 1,117 | 11.53 | 616  | 5.73 | 875  | 5.26 | 882  | 5.17 |
| Women | 200  | 4.19           | 288  | 6.16 | 330   | 6.67 | 437   | 9.45  | 234  | 5.68 | 350  | 6.79 | 374  | 7.20 |

<sup>a</sup> In the Vital Statistics, event of undetermined intent was coded according to the International Classification of Disease (ICD) as follows: ICD-8 codes: E980–E989 in 1975; ICD-9 codes: E980–E989 in 1980 to 1990; and ICD-10 codes: Y10–Y34 in 1995 to 2005.

<sup>b</sup> The percentages of deaths classified as undetermined intent among certified suicides and undetermined deaths combined are shown. In the Vital Statistics, suicide was coded according to the ICD as follows: ICD-8 codes: E950–E959 in 1975; ICD-9 codes: E950–E959 in 1980 to 1990; and ICD-10 codes: X60–X84 in 1995 to 2005.
